# Supplementary material for: Electrospun cellulose acetate doped with astaxanthin derivatives from Haematococcus pluvialis for in vivo anti-aging activity
Source: PubMed Central journal article supplement (PMC9088889; doi:10.1039/c8ra08156e), 2018-11-05
Supplement: RA-008-C8RA08156E-s001.pdf [file RA-008-C8RA08156E-s001.pdf]

## Supplementary data

### **Electrospun cellulose acetate doped with astaxanthin derivatives from *Haematococcus pluvialis* for in vivo anti-aging activity**

Jukkrit Nootem<sup>a</sup>, Pawanrat Chalorak<sup>b</sup>, Krai Meemon<sup>b</sup>, Withawat Mingvanish<sup>a</sup>,  
Kornkanya Pratumyot<sup>a</sup>, Leela Ruckthong<sup>a</sup>, Choladda Srisuwannaket<sup>a</sup>,  
Nakorn Niamnont<sup>a,\*</sup>

<sup>a</sup>*Organic Synthesis, Electrochemistry & Natural Product Research Unit, Department of Chemistry, Faculty of Science, King Mongkut's University of Technology Thonburi, Bangkok, 10140, Thailand.*

<sup>b</sup>*Department of Anatomy, Faculty of Science, Mahidol University Bangkok, 10400, Thailand.*

Email: [nakorn.nia@kmutt.ac.th](mailto:nakorn.nia@kmutt.ac.th)

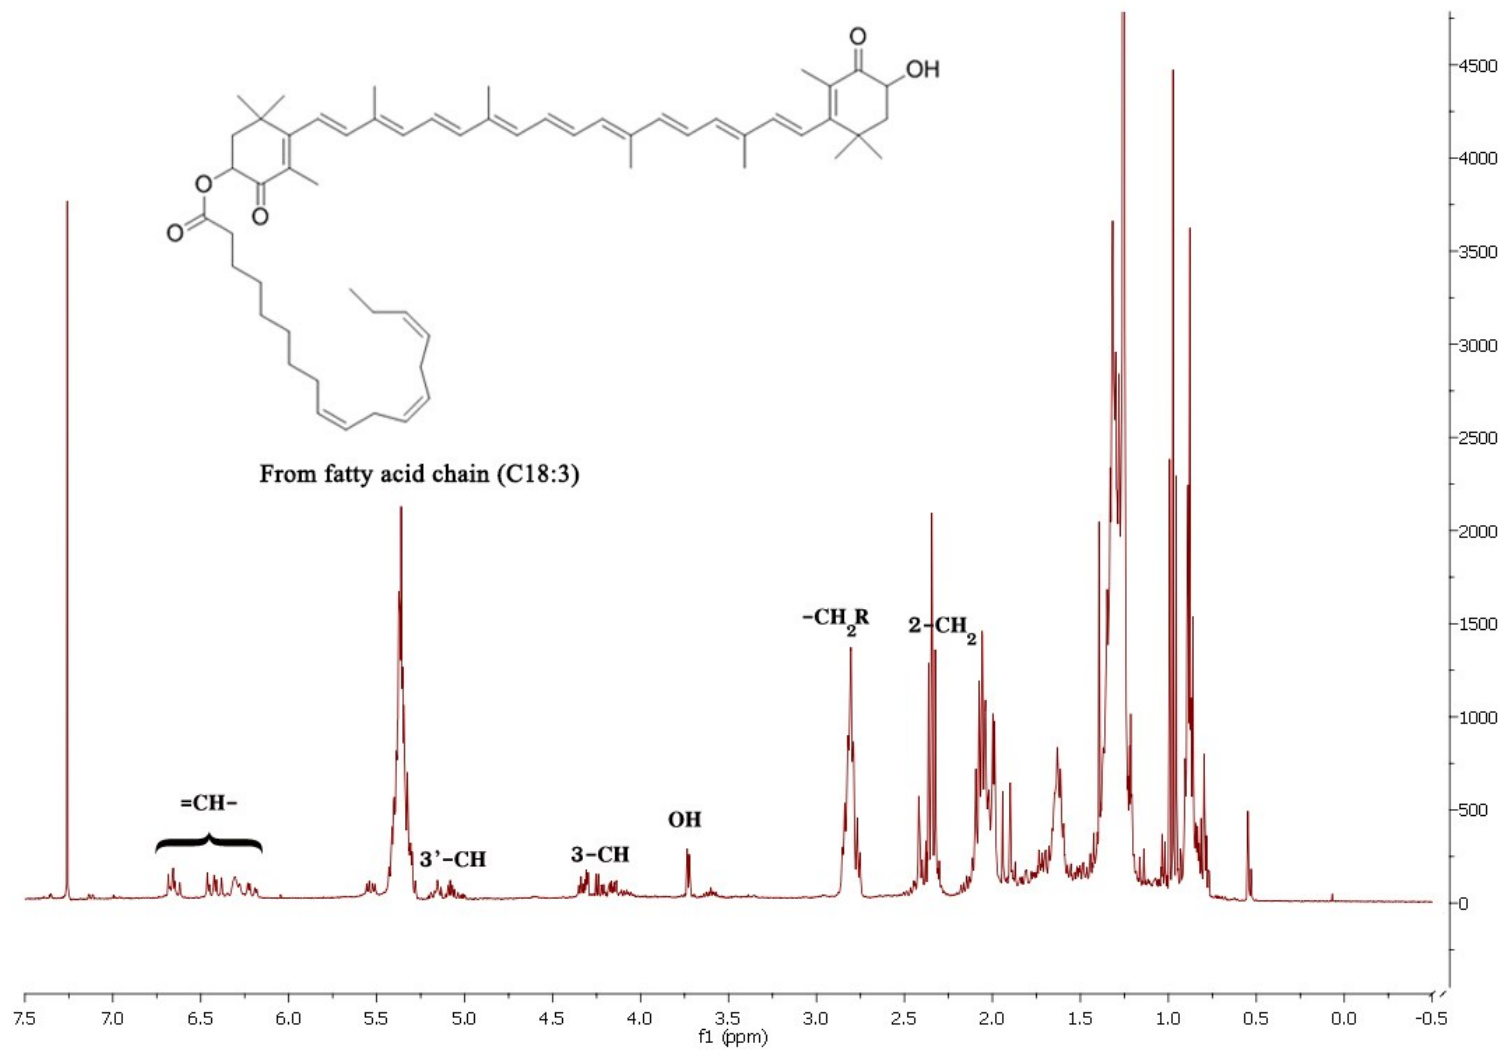

**Figure. S1**  $^1\text{H-NMR}$  400 MHz spectra of astaxanthin monoester in  $\text{CDCl}_3$ .

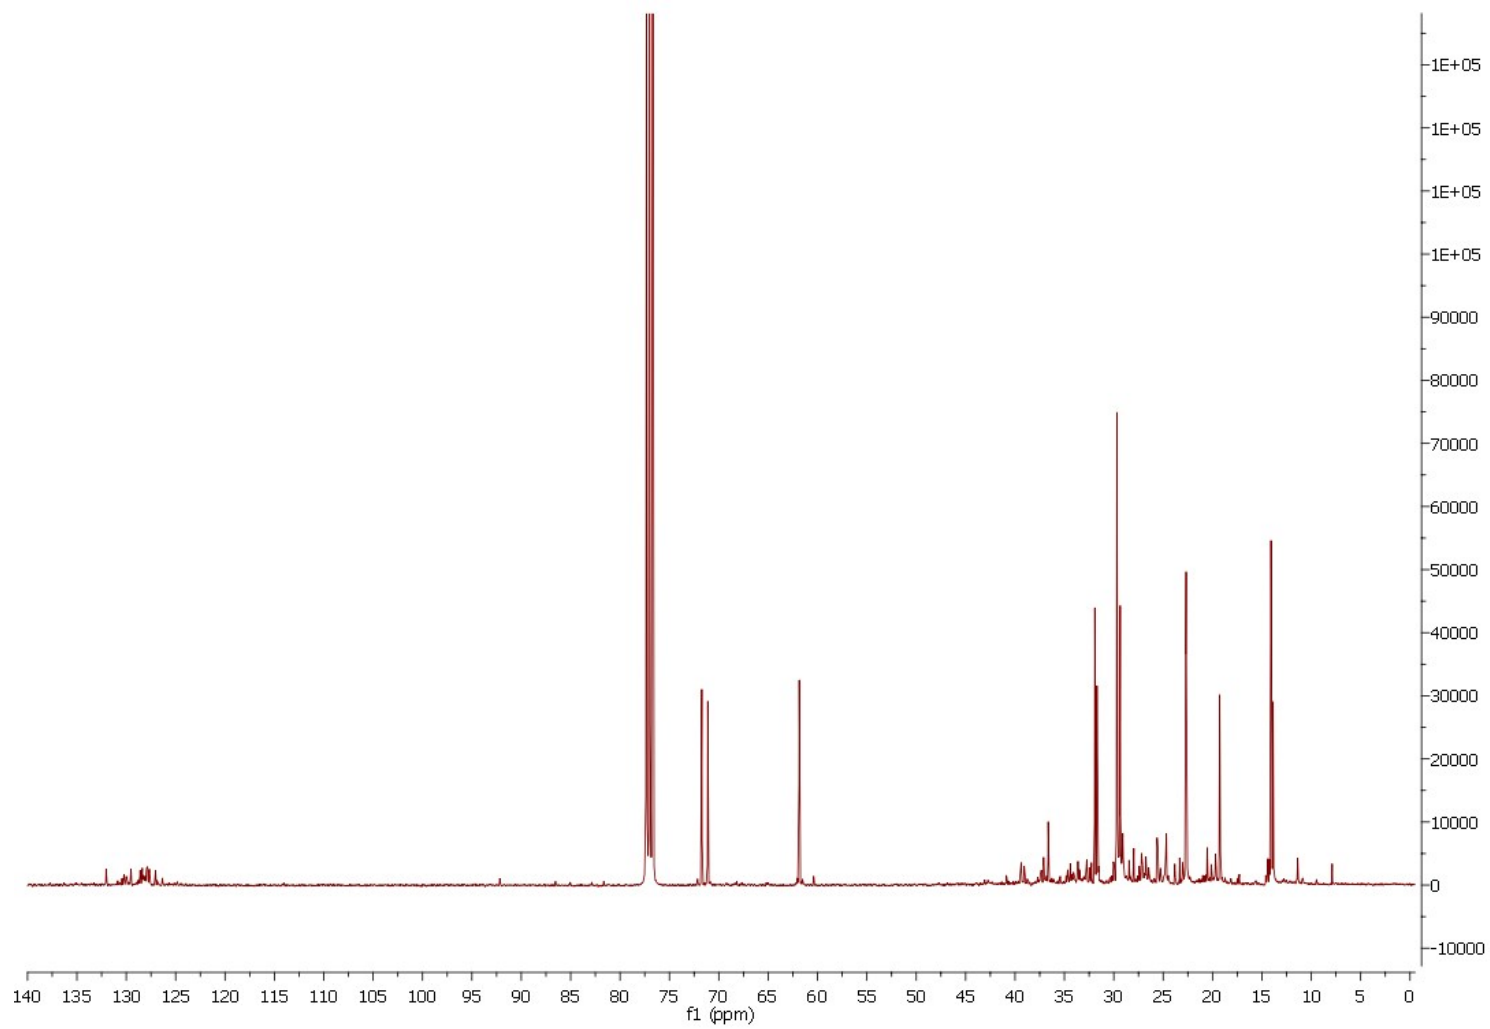

**Figure. S2**  $^{13}\text{C}$ -NMR 100 MHz spectra of astaxanthin monoester in  $\text{CDCl}_3$ .

| Acquisition Parameter |            |                      |          |                  |           |
|-----------------------|------------|----------------------|----------|------------------|-----------|
| Source Type           | ESI        | Ion Polarity         | Positive | Set Nebulizer    | 0.3 Bar   |
| Focus                 | Not active |                      |          | Set Dry Heater   | 180 °C    |
| Scan Begin            | 100 m/z    | Set Capillary        | 4500 V   | Set Dry Gas      | 4.0 l/min |
| Scan End              | 1500 m/z   | Set End Plate Offset | -500 V   | Set Divert Valve | Source    |

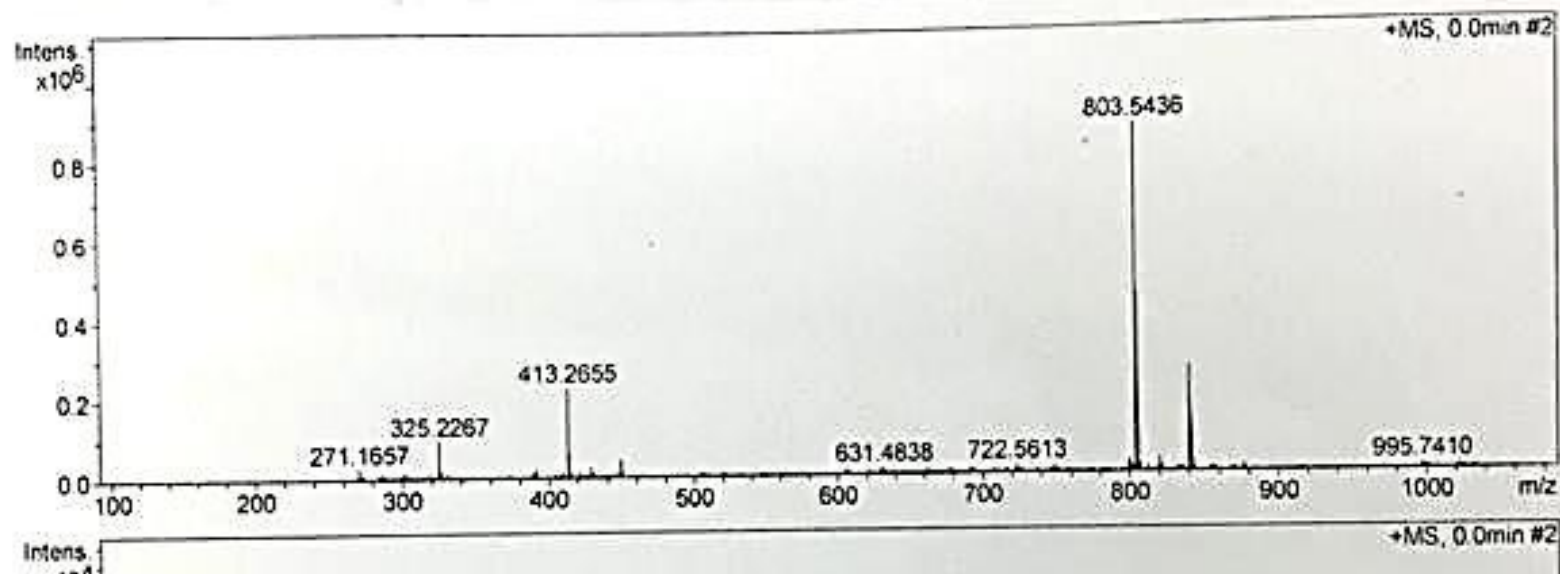

**Figure. S3** HRMS spectra of astaxanthin monoester.

**Table S1.** Chlorophyll a, chlorophyll b and total carotenoids content of DPPH radical scavenging activity from *H. pluvialis* extraction. cE is means crude extraction.

| Determination                    | Value (mg/g cE) |
|----------------------------------|-----------------|
| <b>Chlorophyll a</b>             | 8.72±0.25       |
| <b>Chlorophyll b</b>             | 2.54±0.38       |
| <b>Total carotenoids content</b> | 10.75±0.16      |

**Table S2.** IR spectra of astaxanthin derivatives, CA fibers and astaxanthin derivatives loaded CA fibers.

| Sample                                          | Wave number (cm <sup>-1</sup> ) | Vibration mode               |
|-------------------------------------------------|---------------------------------|------------------------------|
| <b>Astaxanthin derivatives</b>                  | 3,485                           | O-H stretching               |
|                                                 | 2,964                           | CH <sub>2</sub> stretching   |
|                                                 | 1,652                           | C=C stretching               |
|                                                 | 978                             | C-H stretching               |
| <b>CA fibers</b>                                | 3,472                           | O-H stretching               |
|                                                 | 2,925                           | CH <sub>2</sub> stretching   |
|                                                 | 1,741                           | C=C stretching               |
|                                                 | 1,368                           | C-CH <sub>3</sub> stretching |
|                                                 | 1,228                           | C-O-C stretching             |
|                                                 | 1,037                           | C-O-C stretching             |
| <b>Astaxanthin derivatives loaded CA fibers</b> | 3,489                           | O-H stretching               |
|                                                 | 2,932                           | CH <sub>2</sub> stretching   |
|                                                 | 1,750                           | C=O stretching               |
|                                                 | 1,660                           | C-CH <sub>3</sub> stretching |
|                                                 | 1,365                           | C-CH <sub>3</sub> stretching |
|                                                 | 1,231                           | C-O-C stretching             |
|                                                 | 1,309                           | C-O-C stretching             |
